# Supplementary material
Source: publisher figshare collection journal article supplement (https://frontiersin.figshare.com/ndownloader/files/20135837)
Supplement: Supplementary file 1 [file 20135837]

## Sheet: Tabelle1
This is the extended version of Table 1, including DESeq2-generated statistics for all OTUs tested for differential abundance.
Habitat	Kingdom	Phylum	Class	Order	Family	Genus	OTU ID	OTU passed visual check of abundance increase in comparison to control	Nucleic acid	DESeq values for preliminary selection of OTUs	Mean of Abundance	log2 Fold Change	log2 Folg Change Standard Error	Wald statistic	Wald test p-value	Benjamini-Hochberg adjusted p-value	notes
Free-living	Bacteria	Proteobacteria	Gammaproteobacteria	Pseudomonadales	Pseudomonadaceae	Pseudomonas	Otu000007	Yes	DNA		2791.14	1.80745	0.161218	11.2113	3.59055e-29	5.17039e-27
								Yes	RNA		6727.75	0.644591	0.0956812	6.73687	1.61839e-11	3.88413e-10
Free-living	Bacteria	Proteobacteria	Gammaproteobacteria	Alteromonadales	Gallaecimonadaceae	Gallaecimonas	Otu000011	Yes	DNA		1429.56	1.69567	0.188934	8.9749	2.83616e-19	2.72271e-17
								Yes	RNA		3791.36	1.36282	0.13959	9.76296	1.62347e-22	2.72742e-20
Free-living	Bacteria	Proteobacteria	Alphaproteobacteria	Thalassobaculales	Thalassobaculaceae	Thalassobaculum	Otu000018	Yes	DNA
								No	RNA		4025.59	-0.964982	0.164642	-5.86109	4.5984e-09	5.94255e-08
Free-living	Bacteria	Proteobacteria	Alphaproteobacteria	Caulobacterales	Hyphomonadaceae	Hyphomonas	Otu000025	Yes	DNA		196.767	0.896314	0.132207	6.77963	1.20485e-11	4.95708e-10
								Yes	RNA		127.423	1.59876	0.242224	6.60037	4.10143e-11	8.613e-10
Free-living	Bacteria	Proteobacteria	Alphaproteobacteria	Sphingomonadales	Sphingomonadaceae	Sphingorhabdus	Otu000032	Yes	DNA		209.059	1.60926	0.258553	6.22407	4.84418e-10	1.55014e-08
								No	RNA
Free-living	Bacteria	Proteobacteria	Gammaproteobacteria	Pseudomonadales	Pseudomonadaceae	Pseudomonas	Otu000036	Yes	DNA		99.1323	1.15826	0.270093	4.28839	1.79969e-05	0.000259156
								Yes	RNA
Free-living	Bacteria	Proteobacteria	Alphaproteobacteria	Rhizobiales	Rhizobiaceae	Rhizobiaceae_unclassified	Otu000037	Yes	DNA		8.67634	4.82779	1.16589	4.14088	3.45984e-05	0.000433232
								No	RNA
Free-living	Bacteria	Proteobacteria	Alphaproteobacteria	Rhizobiales	Xanthobacteraceae	Pseudolabrys	Otu000038	Yes	DNA
								Yes	RNA		15.5185	1.42451	0.419607	3.39487	0.000686622	0.00411973
Biofilm	Bacteria	Proteobacteria	Alphaproteobacteria	Rhizobiales	Xanthobacteraceae	Pseudolabrys	Otu000038	Yes	DNA		142.492	1.20793	0.284405	4.24724	2.16417e-05	0.00275282
								Yes	RNA
Free-living	Bacteria	Proteobacteria	Gammaproteobacteria	Betaproteobacteriales	Methylophilaceae	Methylotenera	Otu000023	Yes	DNA		419.675	-1.29857	0.241911	-5.36799	7.96199e-08	1.6379e-06	Methylotenera OTU 000044 was identified by DESeq2, but OTU000023 was selected by manual inspection
								Yes	RNA
Free-living	Bacteria	Proteobacteria	Alphaproteobacteria	Parvibaculales	Parvibaculaceae	Parvibaculum	Otu000046	Yes	DNA		136.904	1.41178	0.225107	6.27158	3.5739e-10	1.28661e-08
								Yes	RNA		137.702	1.87036	0.271958	6.8774	6.09535e-12	1.7067e-10
Free-living	Bacteria	Proteobacteria	Gammaproteobacteria	Alteromonadales	Idiomarinaceae	Idiomarina	Otu000049	Yes	DNA		45.6539	1.21406	0.338479	3.58681	0.000334754	0.00332446
								No	RNA
Free-living	Bacteria	Proteobacteria	Alphaproteobacteria	Rhizobiales	Rhizobiaceae	Mesorhizobium	Otu000056	Yes	DNA		36.4175	2.63272	0.486232	5.41454	6.14452e-08	1.36125e-06
								Yes	RNA		112.997	1.53775	0.352204	4.36609	1.26491e-05	0.000118058
Free-living	Bacteria	Planctomycetes	Planctomycetacia	Planctomycetales	Gimesiaceae	Gimesia	Otu000058	Yes	DNA		4.144	3.74975	1.02007	3.67597	0.000236952	0.00252749
								No	RNA
Free-living	Bacteria	Proteobacteria	Alphaproteobacteria	Rhodobacterales	Rhodobacteraceae	Loktanella	Otu000059	Yes	DNA		30.0815	1.08038	0.310019	3.48487	0.00049237	0.00458175
								No	RNA
Free-living	Bacteria	Proteobacteria	Alphaproteobacteria	Rhizobiales	Rhizobiaceae	Rhizobiaceae_unclassified	Otu000070	Yes	DNA		43.9616	3.62465	0.473428	7.65618	1.91549e-14	1.10332e-12
								Yes	RNA		58.7469	1.79507	0.38423	4.67187	2.98477e-06	3.58173e-05
Free-living	Bacteria	Proteobacteria	Alphaproteobacteria	Rhizobiales	Rhizobiaceae	Aminobacter	Otu000072	Yes	DNA		27.1759	3.15042	0.60024	5.24859	1.53268e-07	2.94275e-06
								No	RNA
Free-living	Bacteria	Proteobacteria	Gammaproteobacteria	Pseudomonadales	Pseudomonadaceae	Pseudomonas	Otu000078	Yes	DNA		12.3185	5.3351	1.17584	4.53728	5.69848e-06	9.6539e-05
								Yes	RNA		13.4022	4.28044	1.0768	3.97514	7.03374e-05	0.000590834
Free-living	Bacteria	Proteobacteria	Alphaproteobacteria	Rhodobacterales	Rhodobacteraceae	Seohaeicola	Otu000094	Yes	DNA		4.55716	3.91893	0.922048	4.25025	2.13532e-05	0.000292843
								No	RNA
Free-living	Bacteria	Proteobacteria	Gammaproteobacteria	Alteromonadales	Gallaecimonadaceae	Gallaecimonas	Otu000109	Yes	DNA
								Yes	RNA		23.3751	1.12372	0.281754	3.98831	6.65452e-05	0.000588399
Free-living	Bacteria	Proteobacteria	Gammaproteobacteria	Alteromonadales	Gallaecimonadaceae	Gallaecimonas	Otu000129	Yes	DNA
								Yes	RNA		18.5099	1.62872	0.371972	4.3786	1.19443e-05	0.000118038
Free-living	Bacteria	Proteobacteria	Gammaproteobacteria	Betaproteobacteriales	Burkholderiaceae	Hydrogenophaga	Otu000139	Yes	DNA
								Yes	RNA		6.78183	3.74731	1.05376	3.55613	0.000376363	0.00243188
Free-living	Bacteria	Proteobacteria	Gammaproteobacteria	Sphingomonadales	Sphingomonadaceae	Sphingobium	Otu000176	Yes	DNA
								Yes	RNA		2.11336	3.49538	1.08012	3.2361	0.00121173	0.0067857
Free-living	Bacteria	Proteobacteria	Gammaproteobacteria	Puniceispirillales	uncultured	uncultured_ge	Otu000191	Yes	DNA
								Yes	RNA		3.19363	4.09544	1.0549	3.88229	0.000103477	0.000827816
Free-living	Bacteria	Proteobacteria	Alphaproteobacteria	Rhizobiales	Rhizobiaceae	Hoeflea	Otu000320	No	DNA
								Yes	RNA		3.76855	4.33909	1.3672	3.17369	0.00150512	0.00815677
Biofilm	Bacteria	Proteobacteria	Alphaproteobacteria	Rhodobacterales	Rhodobacteraceae	Defluviimonas	Otu000098	Yes	DNA		10.3855	3.21191	0.799391	4.01795	5.87056e-05	0.0046671
								Yes	RNA
Biofilm	Bacteria	Proteobacteria	Alphaproteobacteria	Caulobacterales	Caulobacteraceae	Brevundimonas	Otu000042	Yes	DNA		156.124	0.905516	0.255623	3.54239	0.000396517	0.00330431
								Yes	RNA
	Taxonomy after Silva release 132 and Parks et al. (2018)								DNA and RNA identified as responding to glyphosate
									only DNA
									only RNA
